# Supplementary material for: Nanoalum Formulations Containing Aluminum Hydroxide and CpG 1018TM Adjuvants: The Effect on Stability and Immunogenicity of a Recombinant SARS-CoV-2 RBD Antigen
Source: MDPI journal article supplement (doi:10.3390/vaccines11061030), 2023-05-26
Supplement: s1 [file s1]

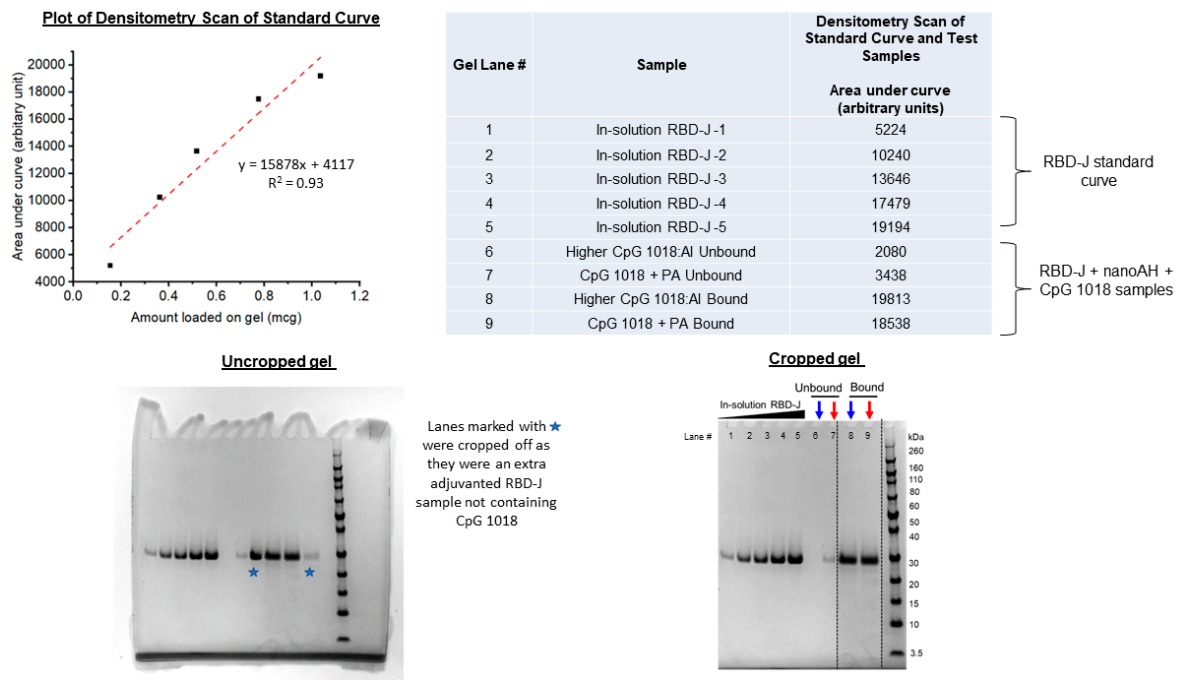

**Figure S1.** Characterization of stabilized nanoAH + CpG 1018-adjuvanted formulations of RBD-J prepared by two different approaches.
